# Supplementary material for: Sustainable chemistry approach for the preparation of bluish green emissive copper nanoclusters fromJusticia adhatodaleaves extract: a facile analytical approach for the sensing of myoglobin andl-thyroxine
Source: Royal Society of Chemistry journal article supplement (doi:10.1039/d2nj02524h), 2022-01-01
Supplement: d2nj02524h1.pdf [file d2nj02524h1.pdf]

## Supporting Information of

**Sustainable chemistry approach for preparation of bluish green emissive copper nanoclusters from *Justicia adhatoda* leaves extract: A facile analytical approach for sensing of myoglobin and L-thyroxine**

**Shraddha Borse<sup>a</sup>, Sanjay Jha<sup>b</sup>, Z. V. P. Murthy<sup>c</sup>, and Suresh Kumar Kailasa<sup>a\*</sup>**

*<sup>a</sup>Department of chemistry, Sardar Vallabhbhai National Institute of Technology, Surat-395 007, India*

*<sup>b</sup>ASPEE Shakilam Biotechnology Institute, Navsari Agricultural University, Surat – 39500, Gujarat, India*

*<sup>b</sup>Department of Chemical Engineering, Sardar Vallabhbhai National Institute of Technology, Surat – 395007, India*

*\*Corresponding author, Phone: +91-261-2201730; Fax: +91-261-2227334*

*E-mail: sureshkumarchem@gmail.com; skk@chem.svnit.ac.in*

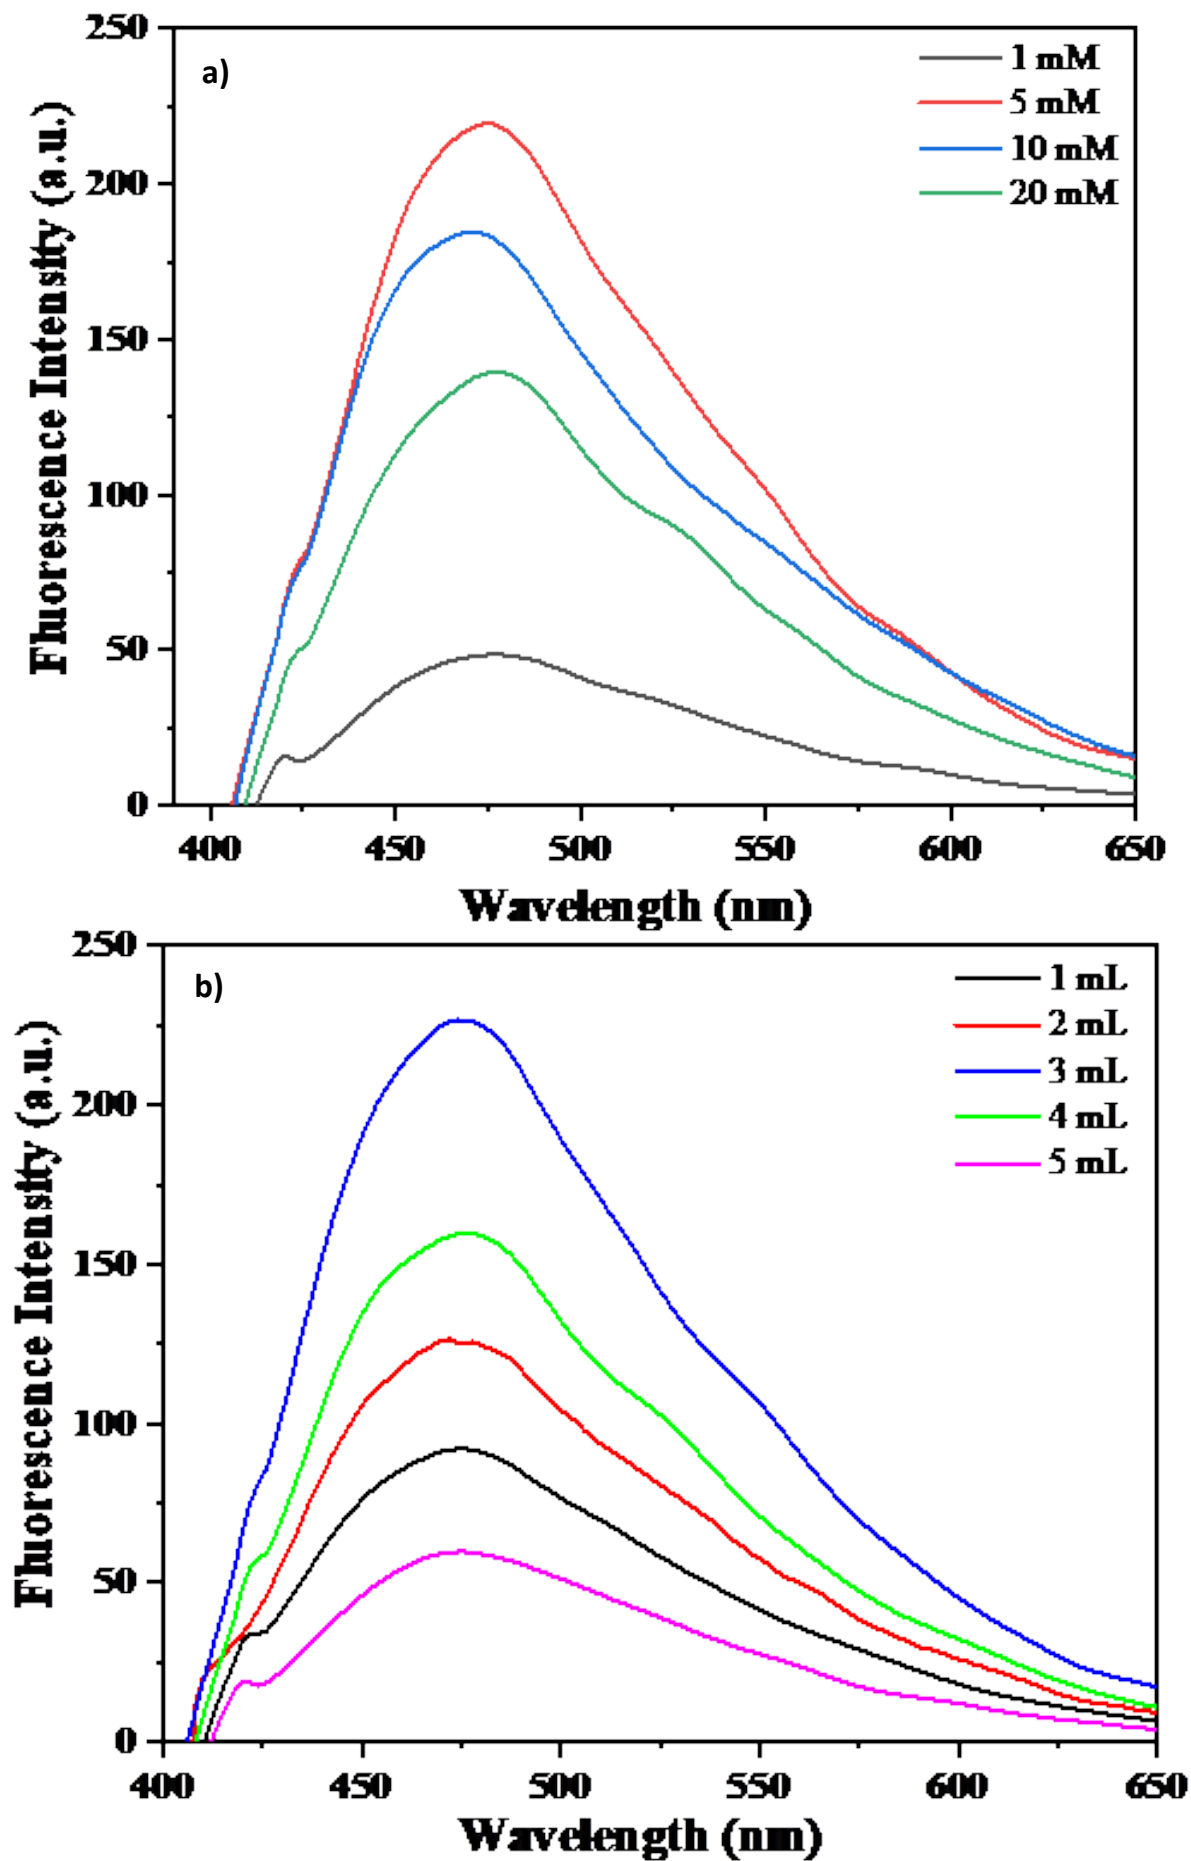

Figure S1. a) Study of fluorescence spectra of Cu NCs using different concentration of copper acetate concentration (1.0 – 20 mM). b) Effect of *J. adhatoda* extract volume (1.0 – 5.0 mL, 50 mg/10 mL) for synthesis of Cu NCs

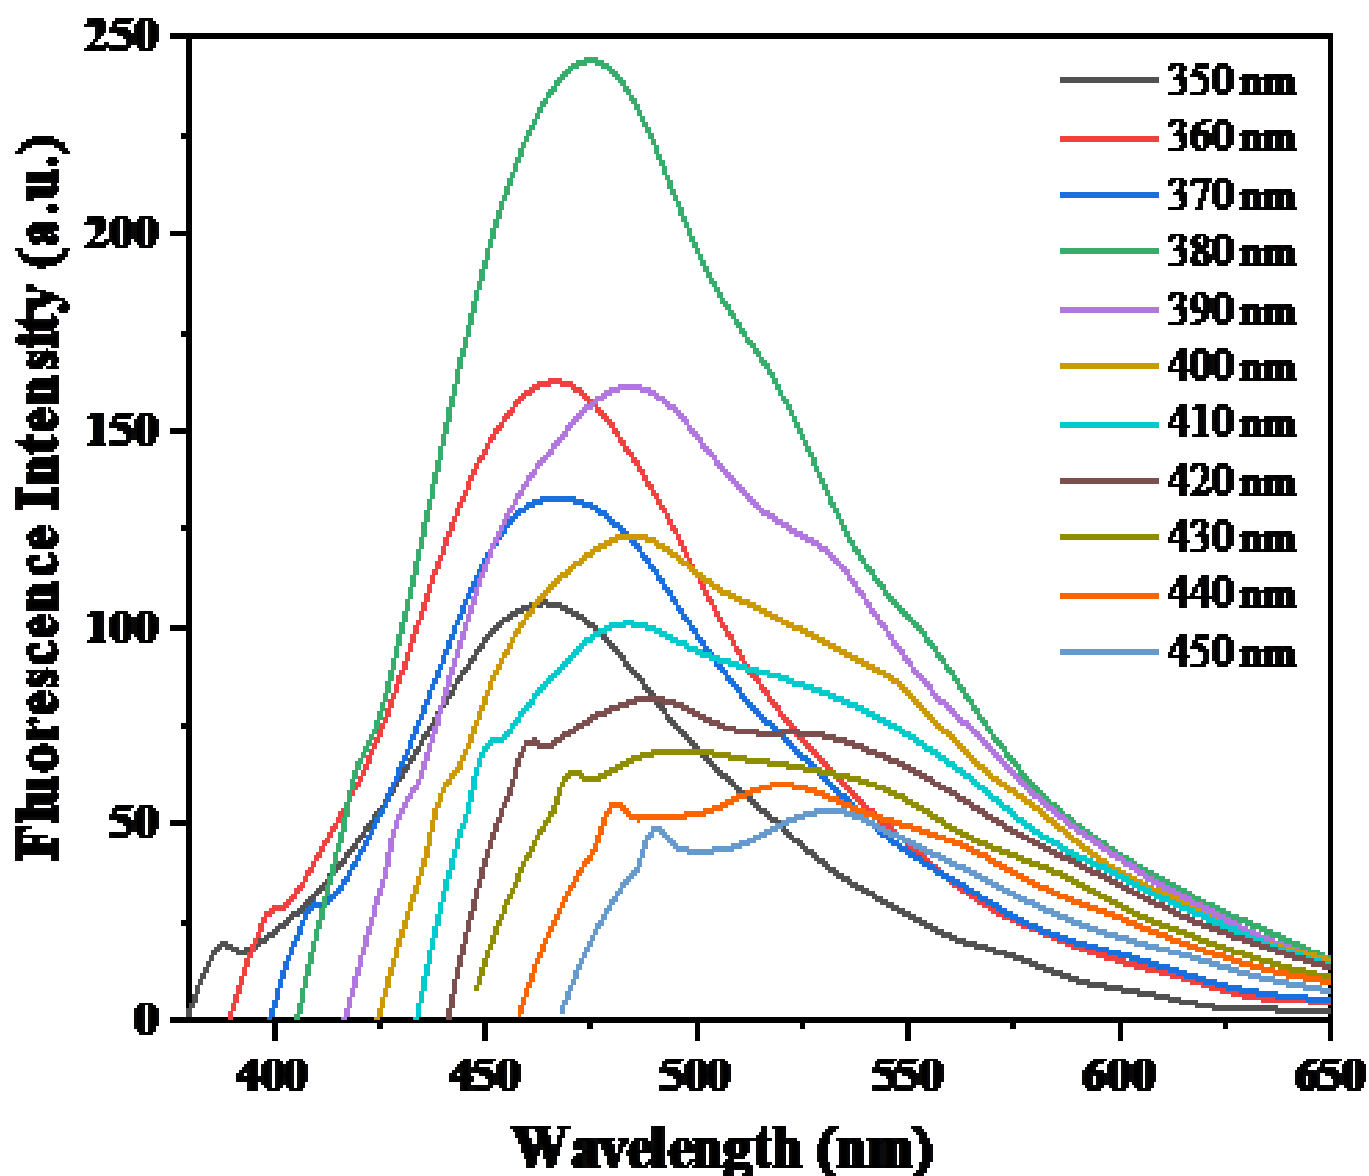

Figure S2. Study of excitation dependent emission spectra of *J. adhatoda*-Cu NCs at different wavelengths (350 – 450 nm)

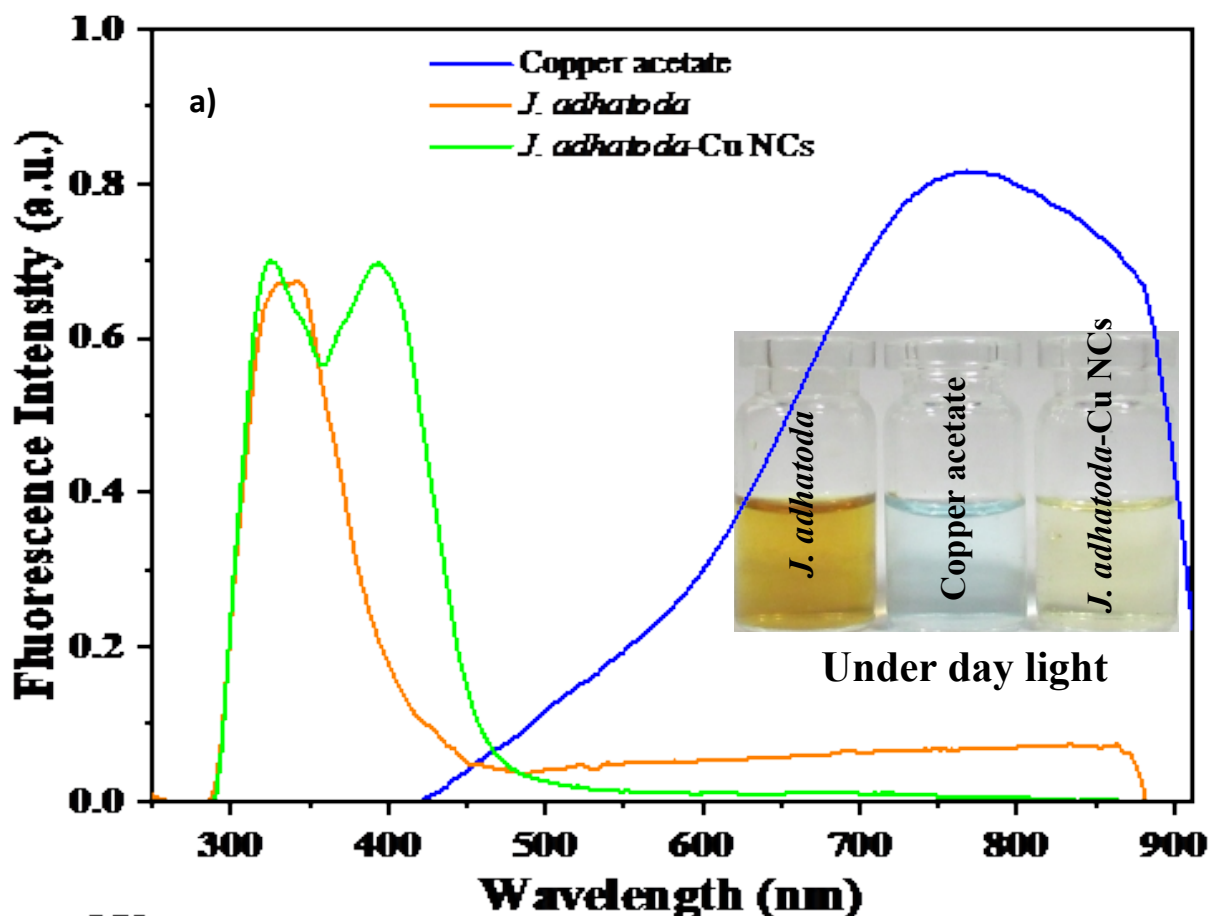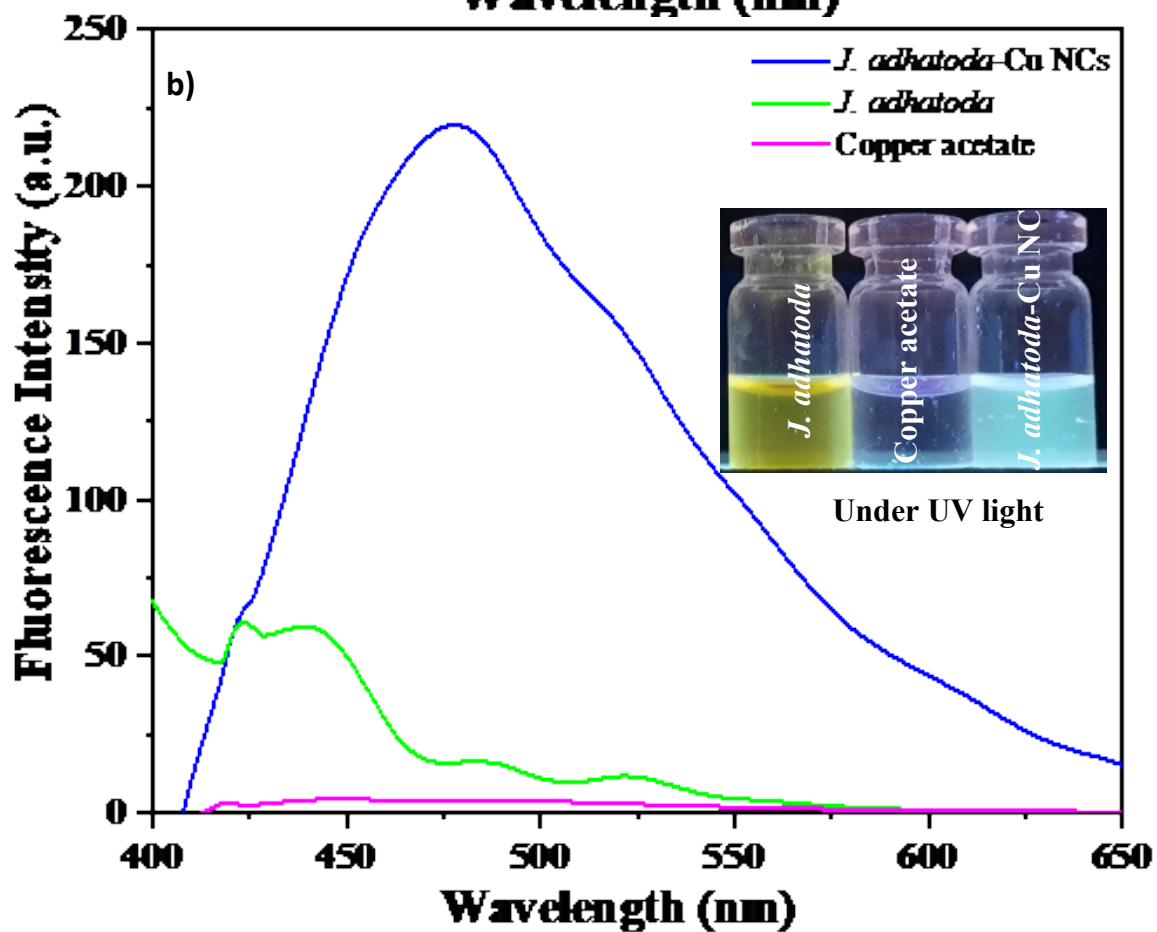

Figure S3. a) Absorption spectra of *J. adhatoda*-Cu NCs, copper acetate and *J. adhatoda* leaves extract. b) Absorption spectra of *J. adhatoda*-Cu NCs, copper acetate and *J. adhatoda* leaves extract. Insets: Photographical images of corresponding solutions in daylight and under UV light.

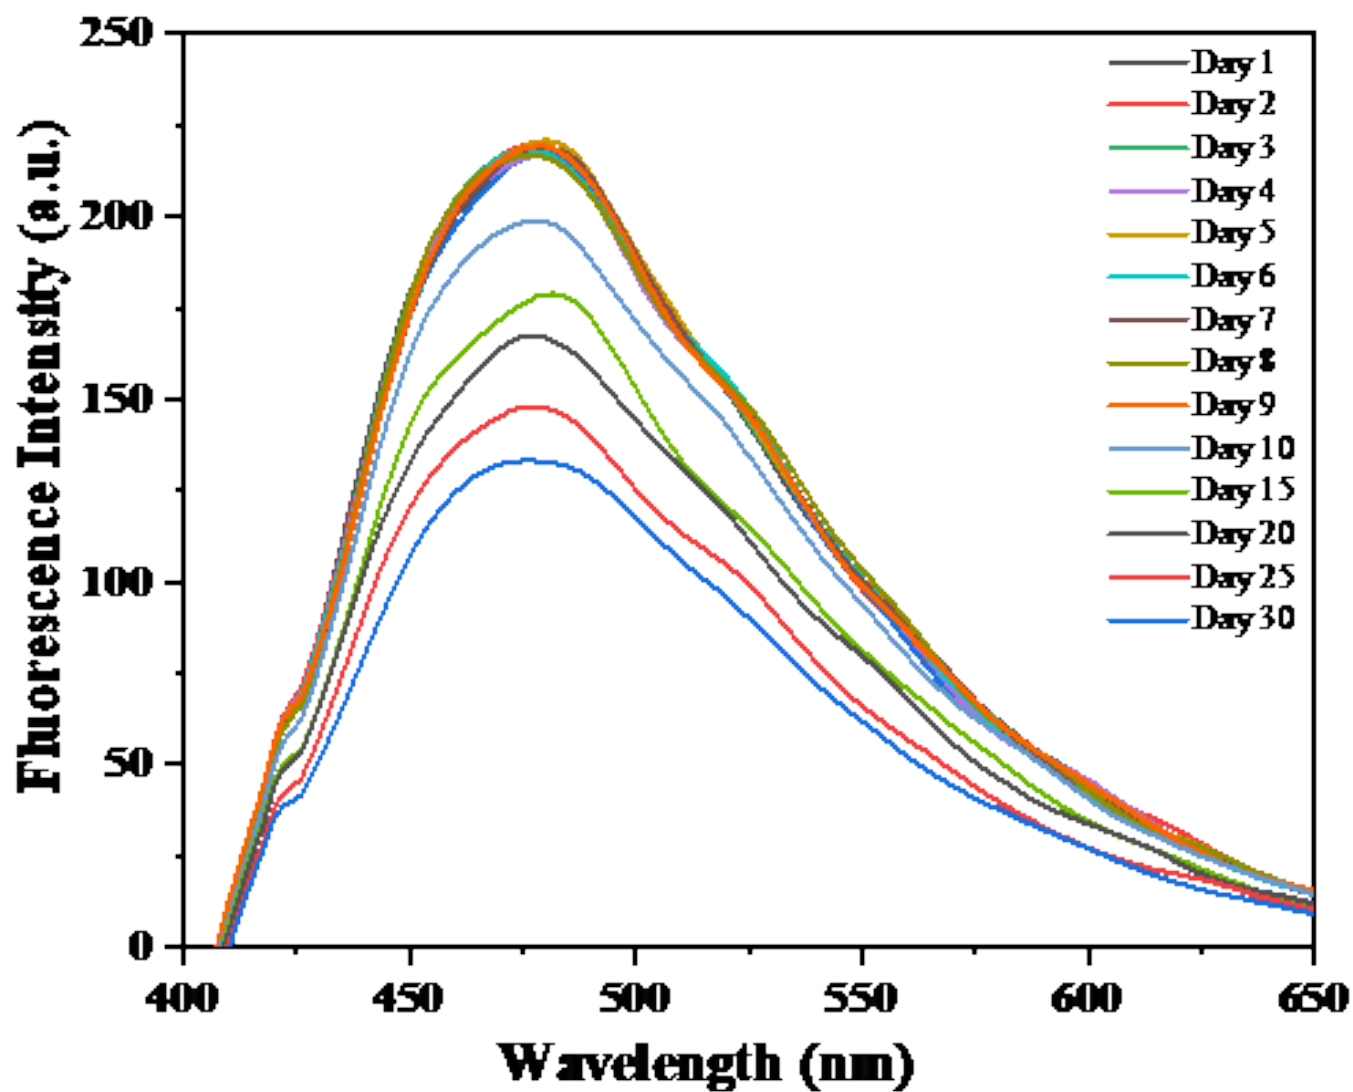

Figure S4. Stability study of *J. adhatoda*-Cu NCs from day 1 to day 30

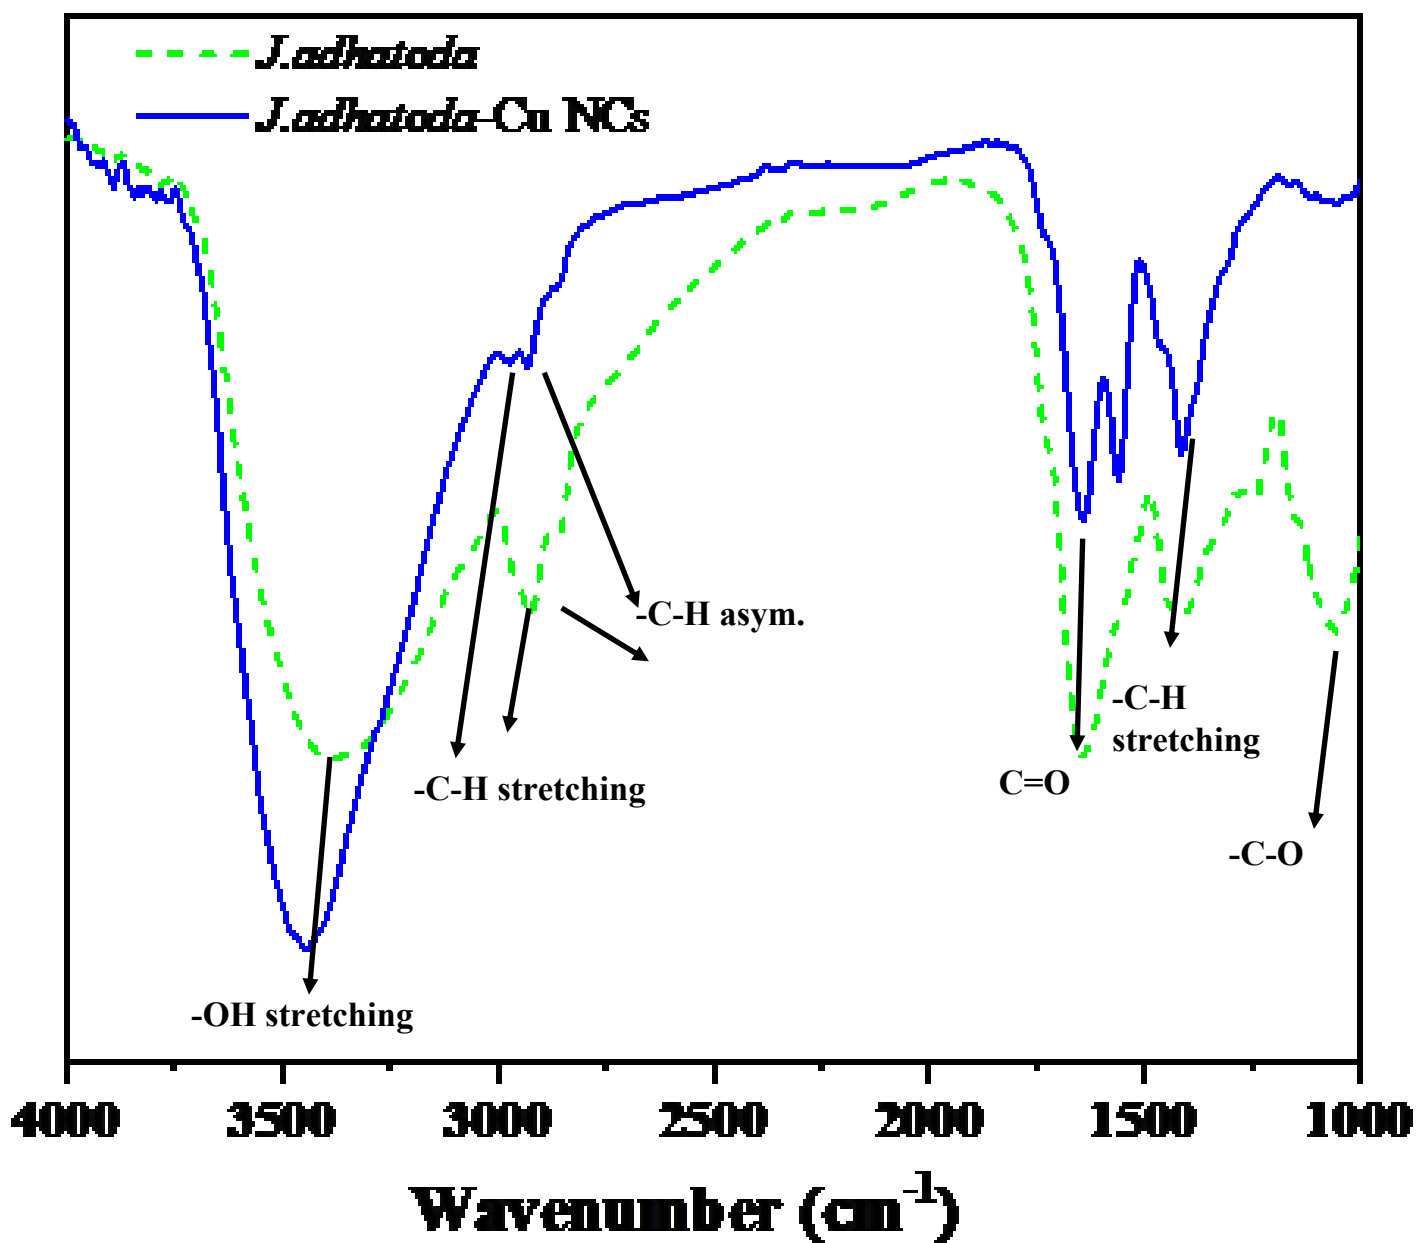

Figure S5. FT-IR spectra of *J. adhatoda* extract and *J. adhatoda*-Cu NCs

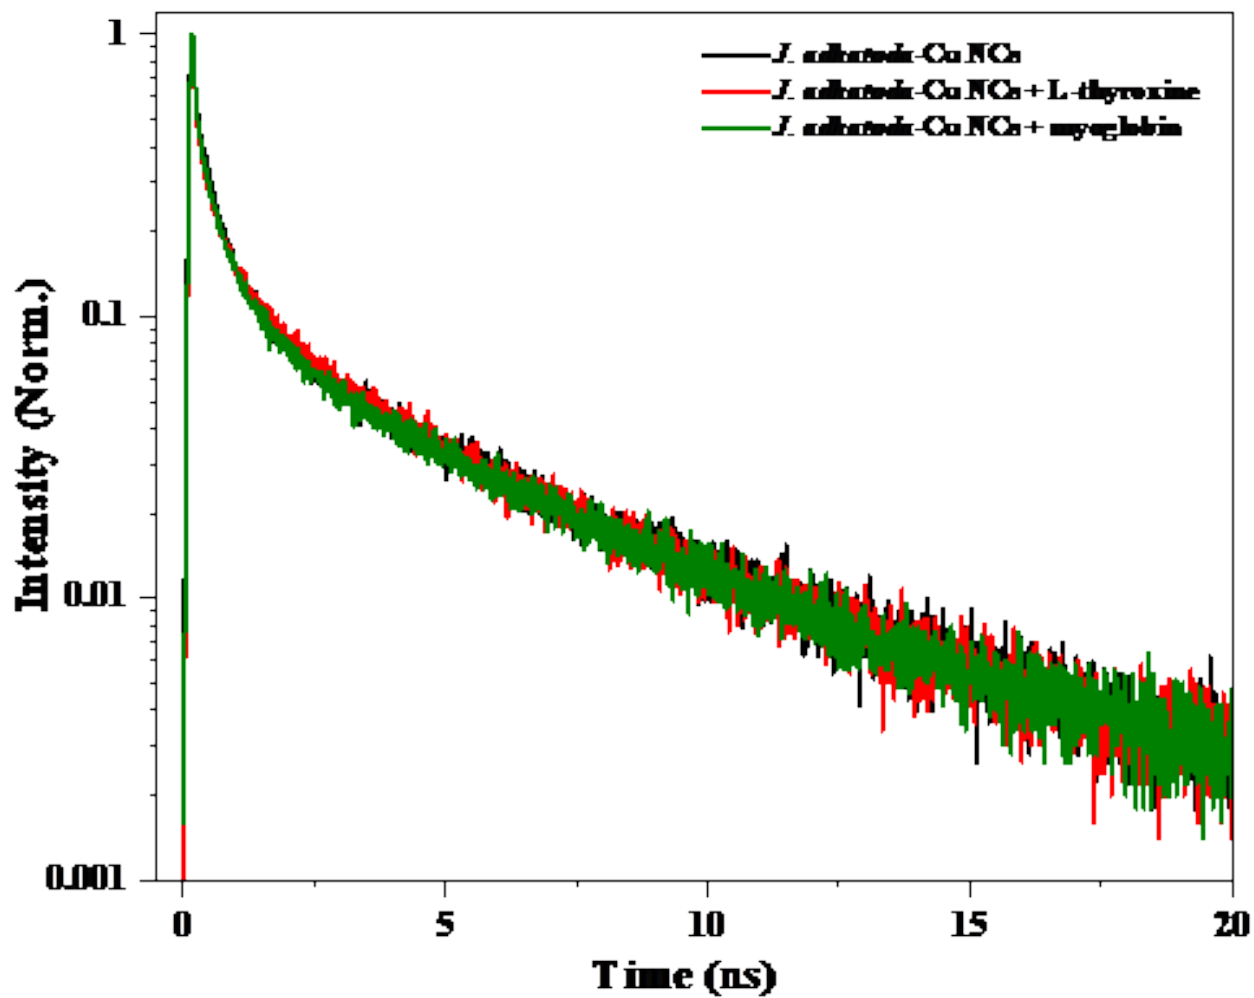

**Figure S6.** Life time analysis of *J. adhatoda*-Cu NCs and *J. adhatoda*-Cu NCs with myoglobin and L-thyroxine

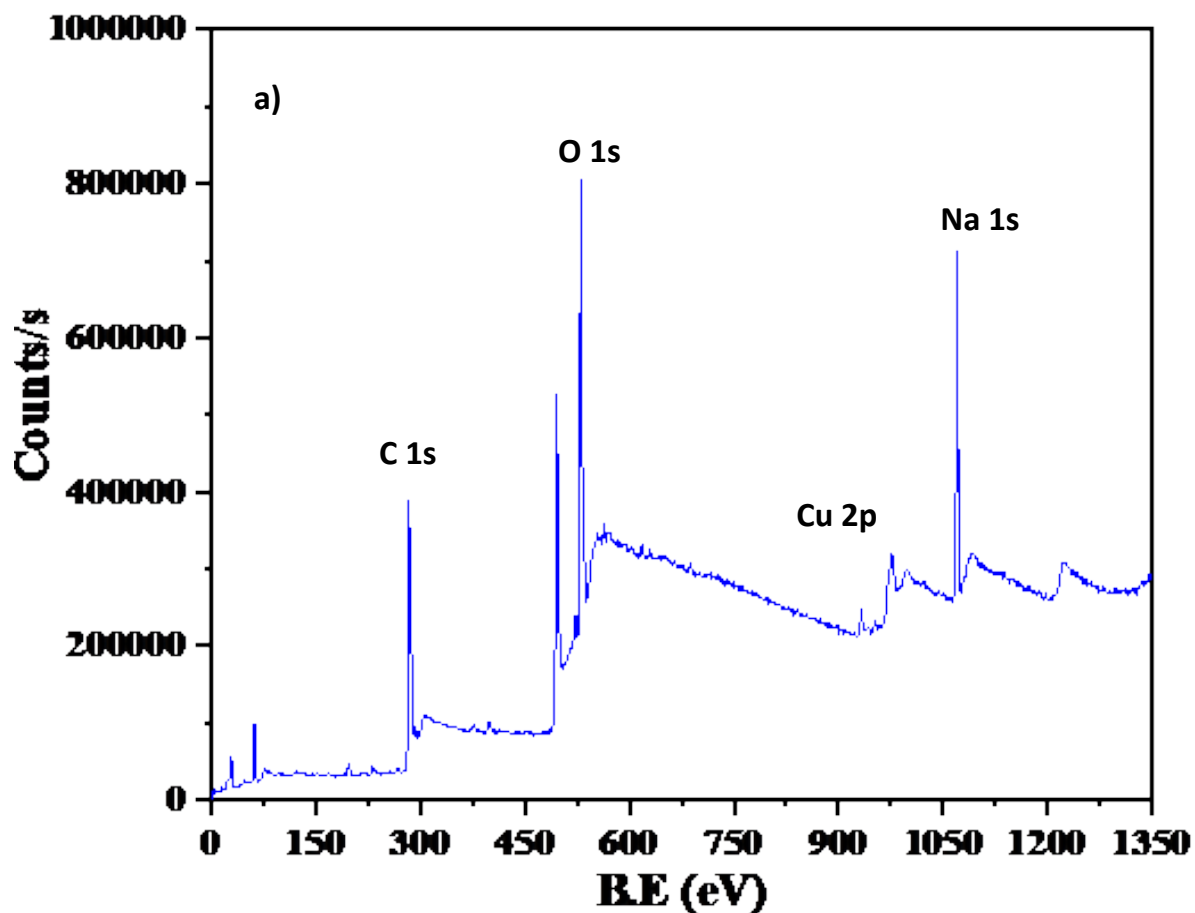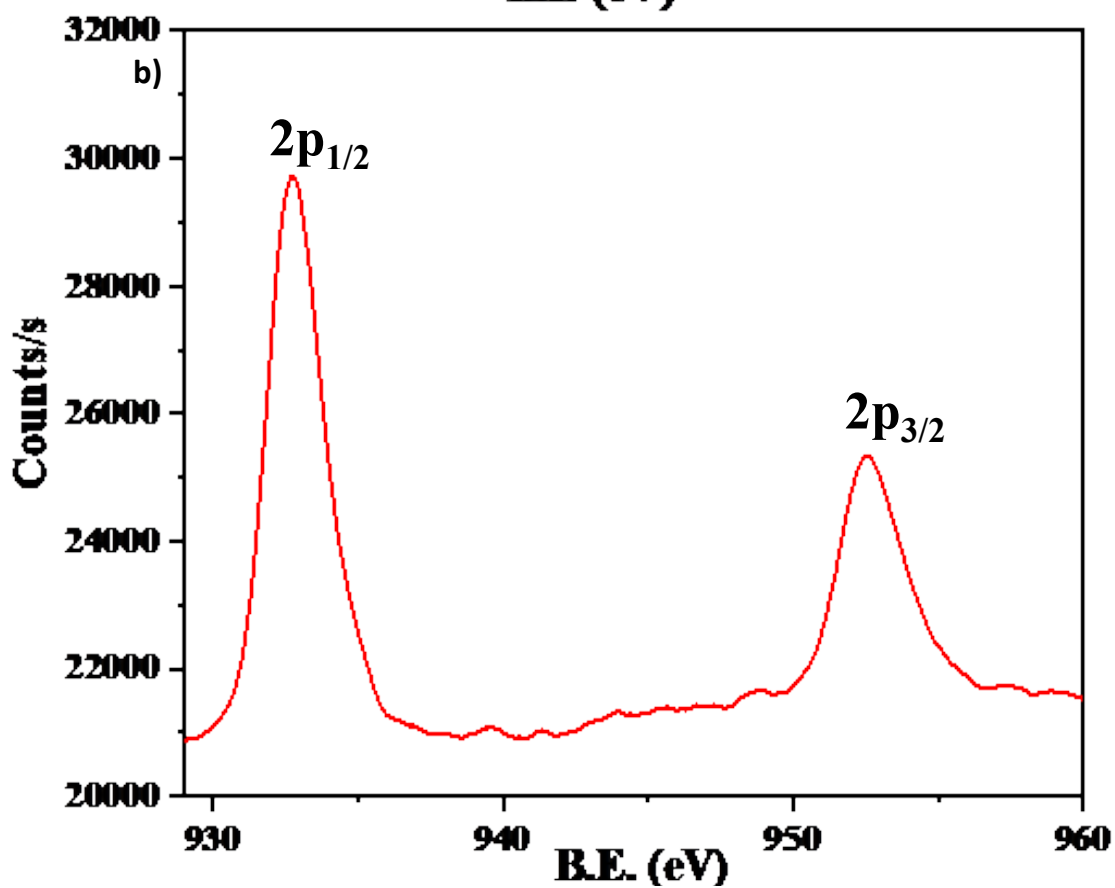

Figure S7. XPS analysis of *J. adhatoda*-Cu NCs, a) XPS survey of *J. adhatoda*-Cu NCs and b) XPS graph showing two oxidation state ( $\text{Cu } 2p_{1/2}$  and  $\text{Cu } 2p_{3/2}$ ) of Cu in *J. adhatoda*-Cu NCs.



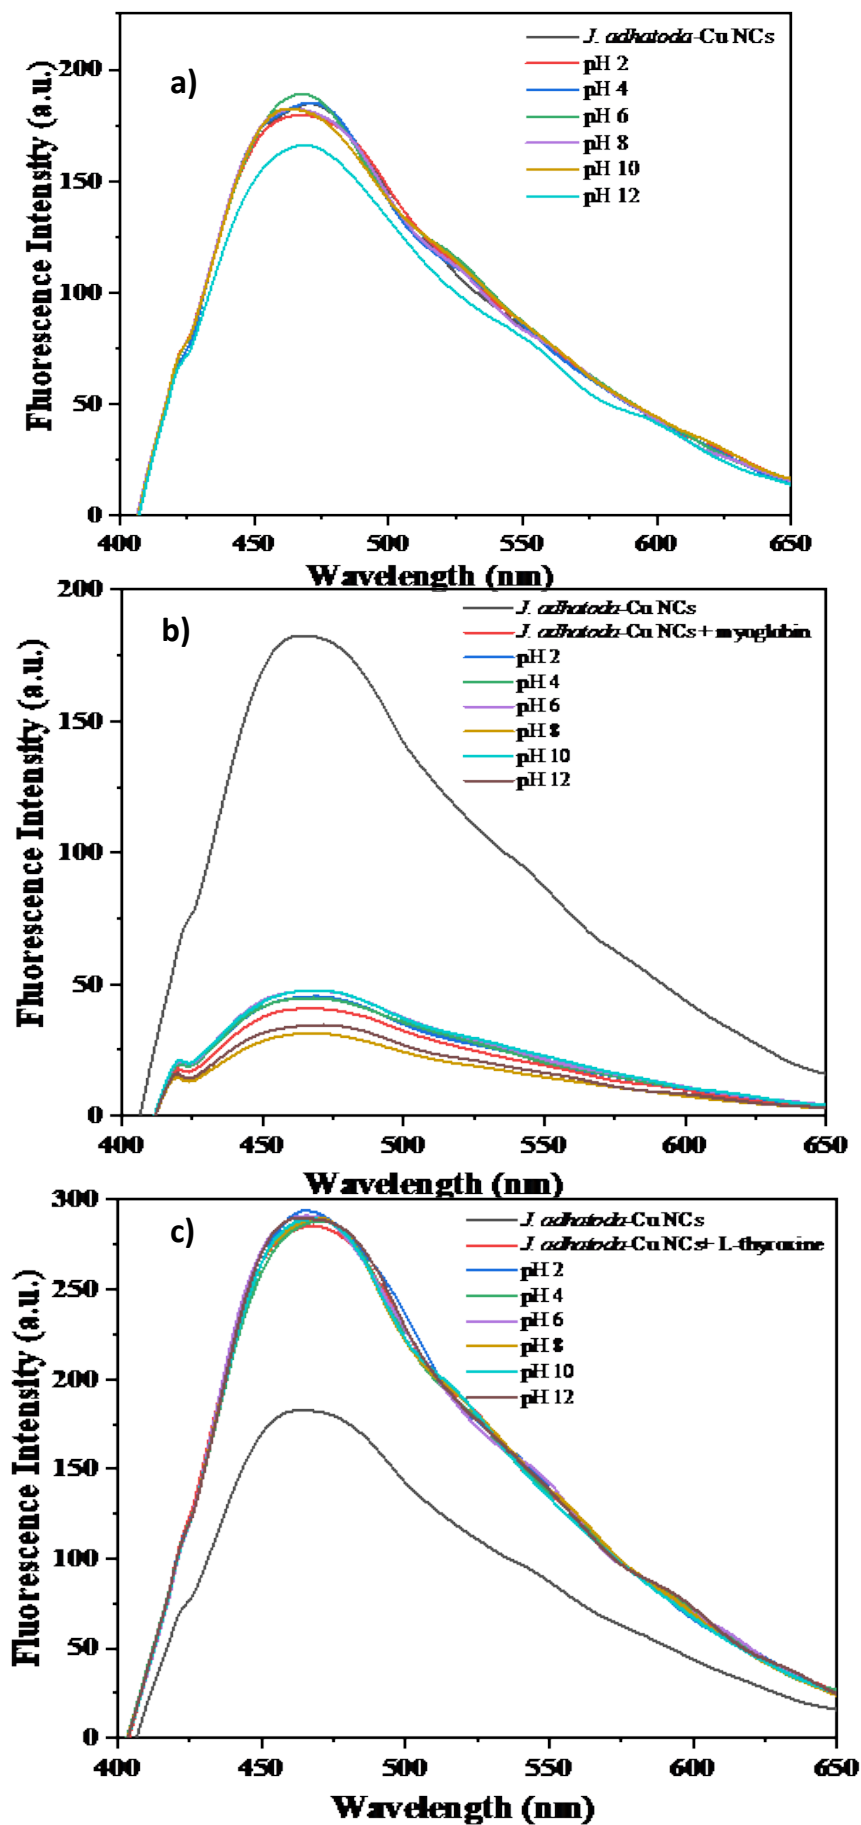

Figure S8. Effect of PBS pH on emission spectra of a) *J. adhatoda*-Cu NCs, in presence of b) myoglobin and c) L-thyroxine

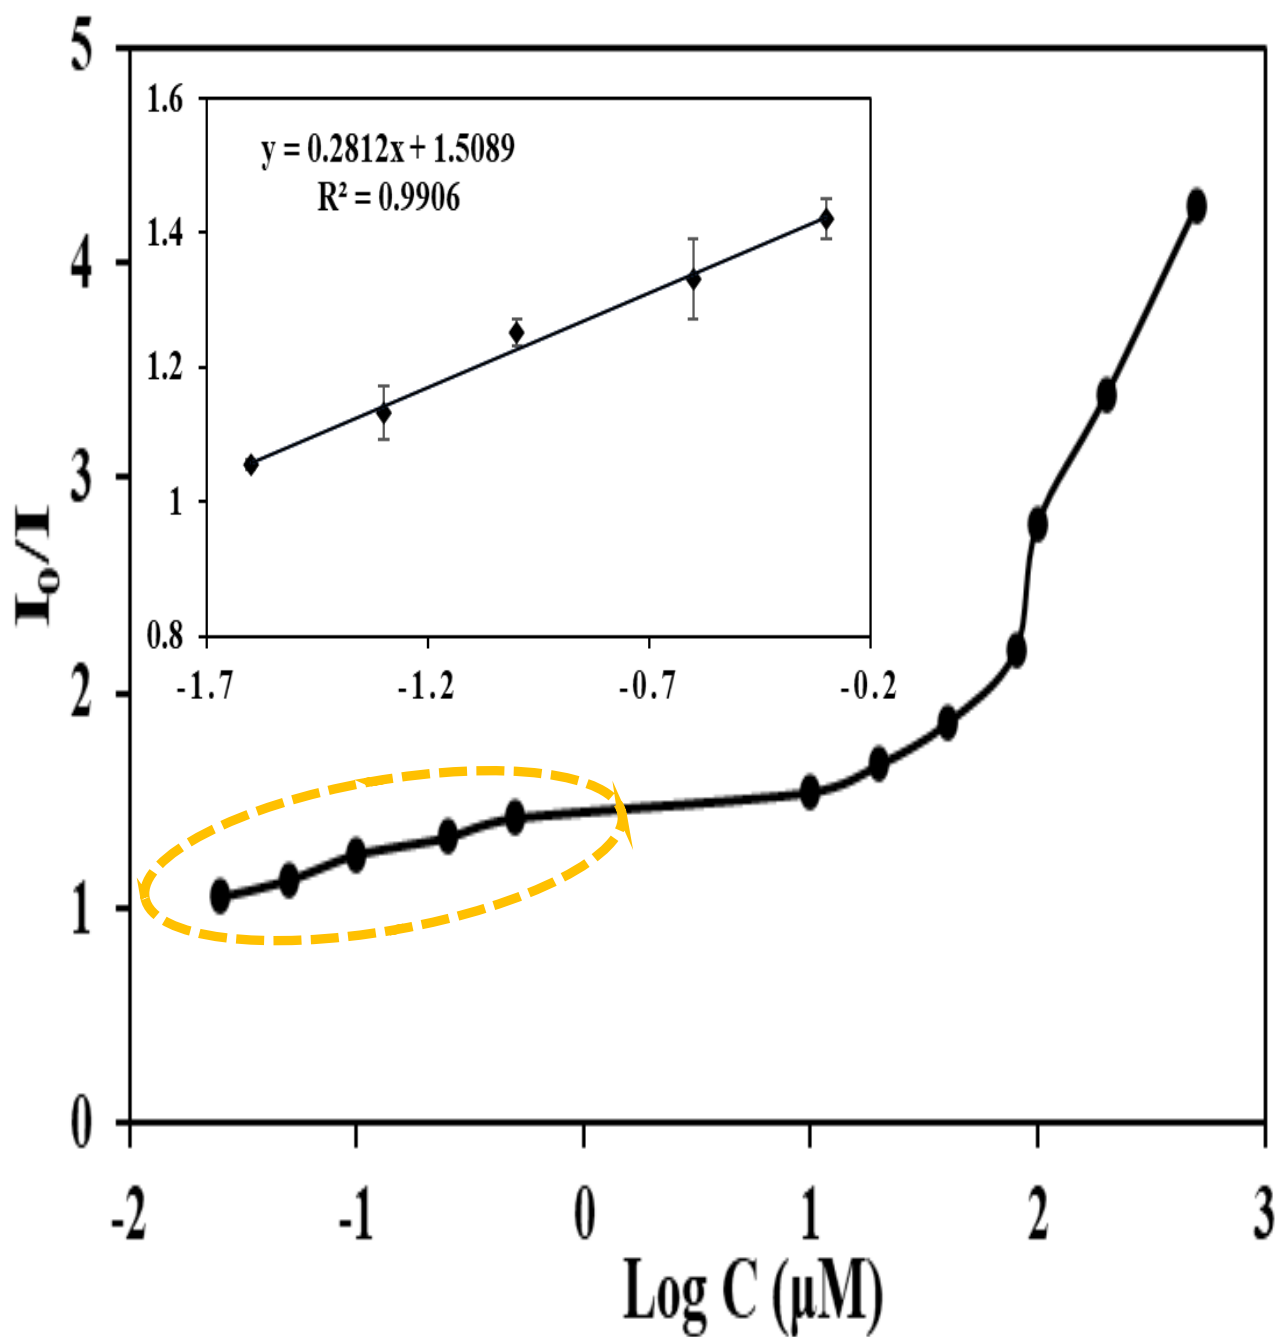

**Figure S9.** Calibration curve constructed from the ratio of emission intensity of *J. adhatoda*-Cu NCs with increasing concentration of myoglobin (0.025 – 500  $\mu\text{M}$ ) ( $n=3$ ).

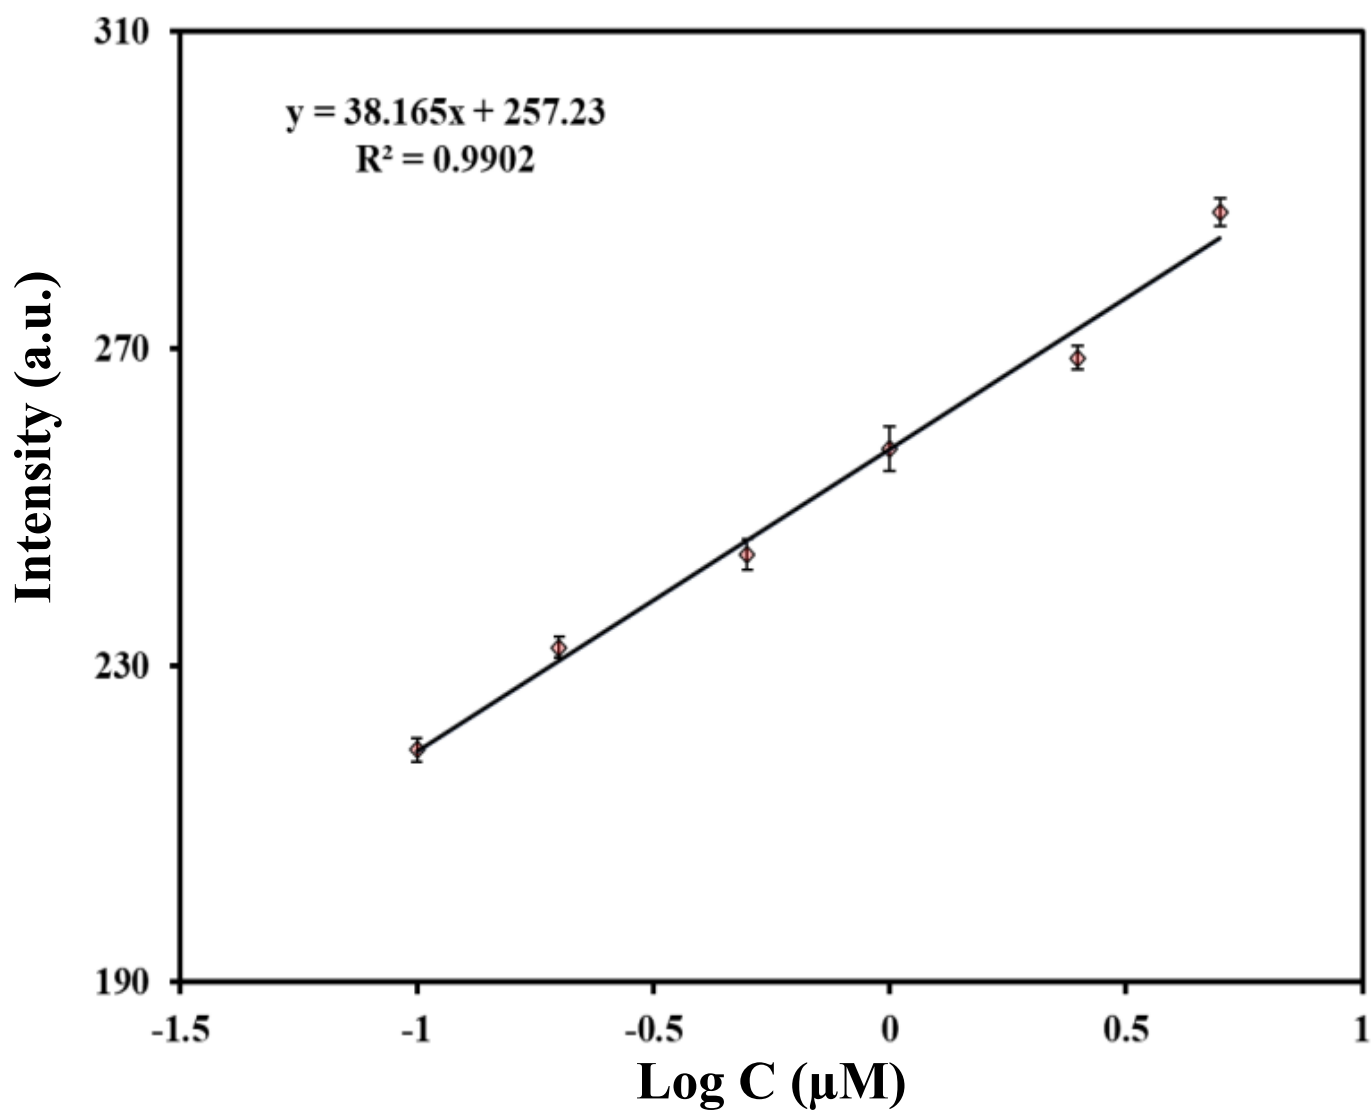

**Figure S10.** Calibration curve constructed from the ratio of emission intensity of *J. adhatoda*-Cu NCs with increasing concentration of L- thyroxine (0.1-2.5 μM) (n=3).

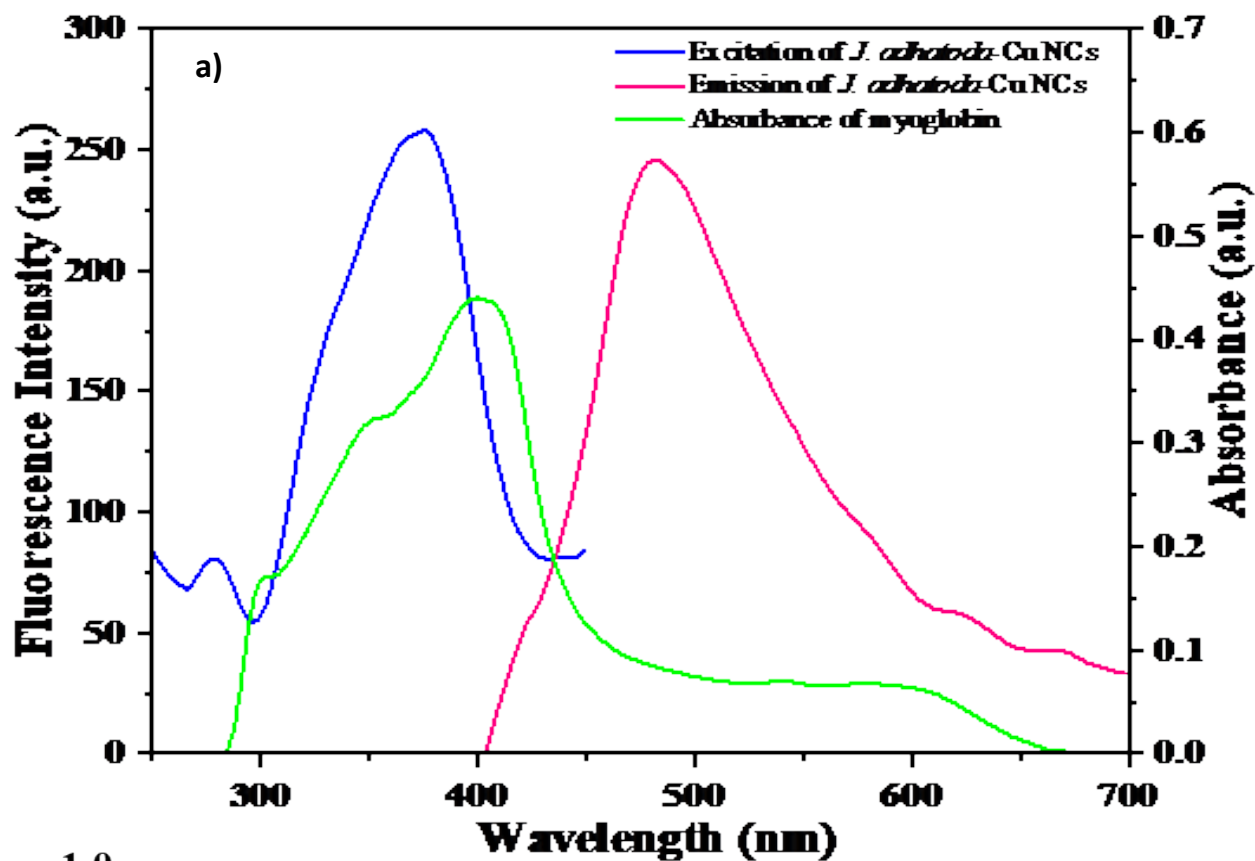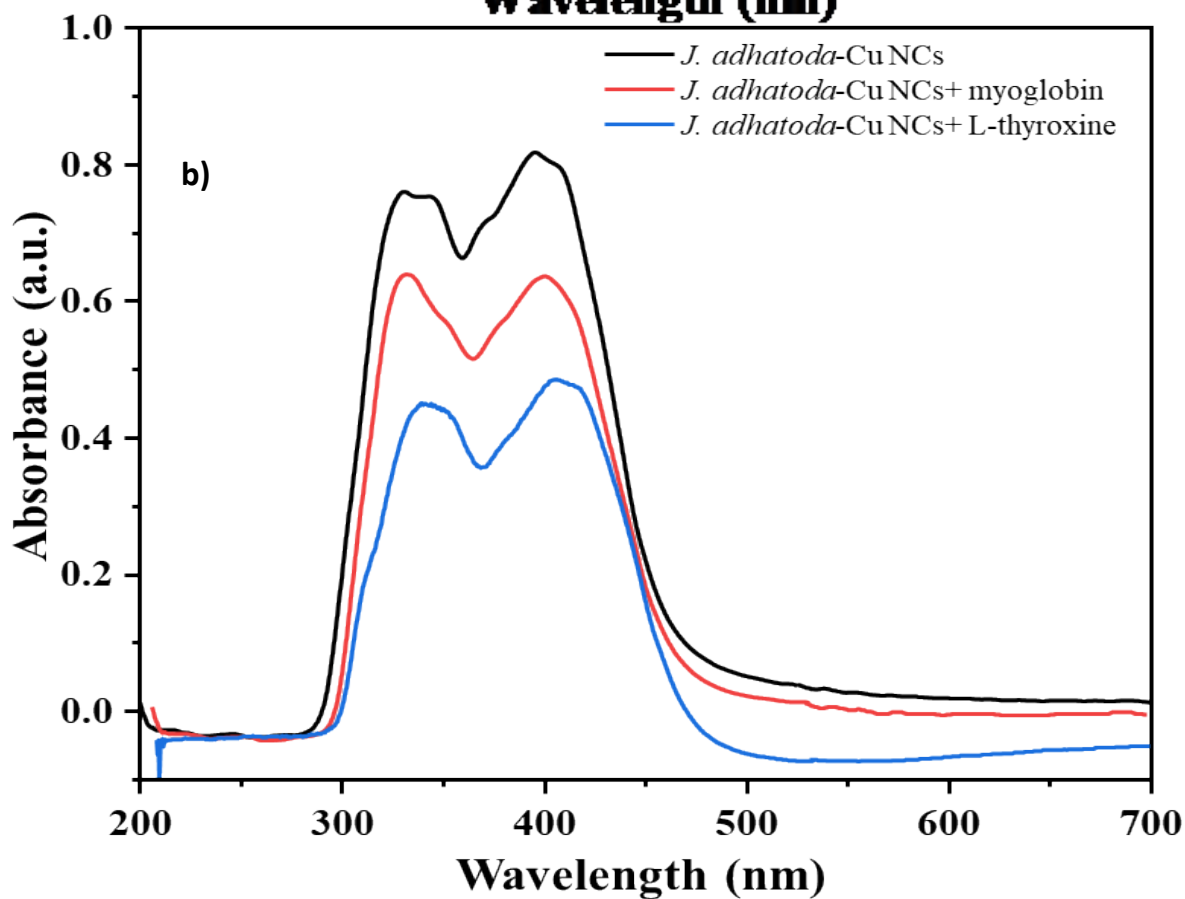

**Figure S11.** a) Excitation & emission spectra of *J. adhatoda*-Cu NCs and absorption spectrum of myoglobin b) UV spectra of *J. adhatoda*-Cu NCs and *J. adhatoda*-Cu NCs with L-thyroxine and myoglobin.

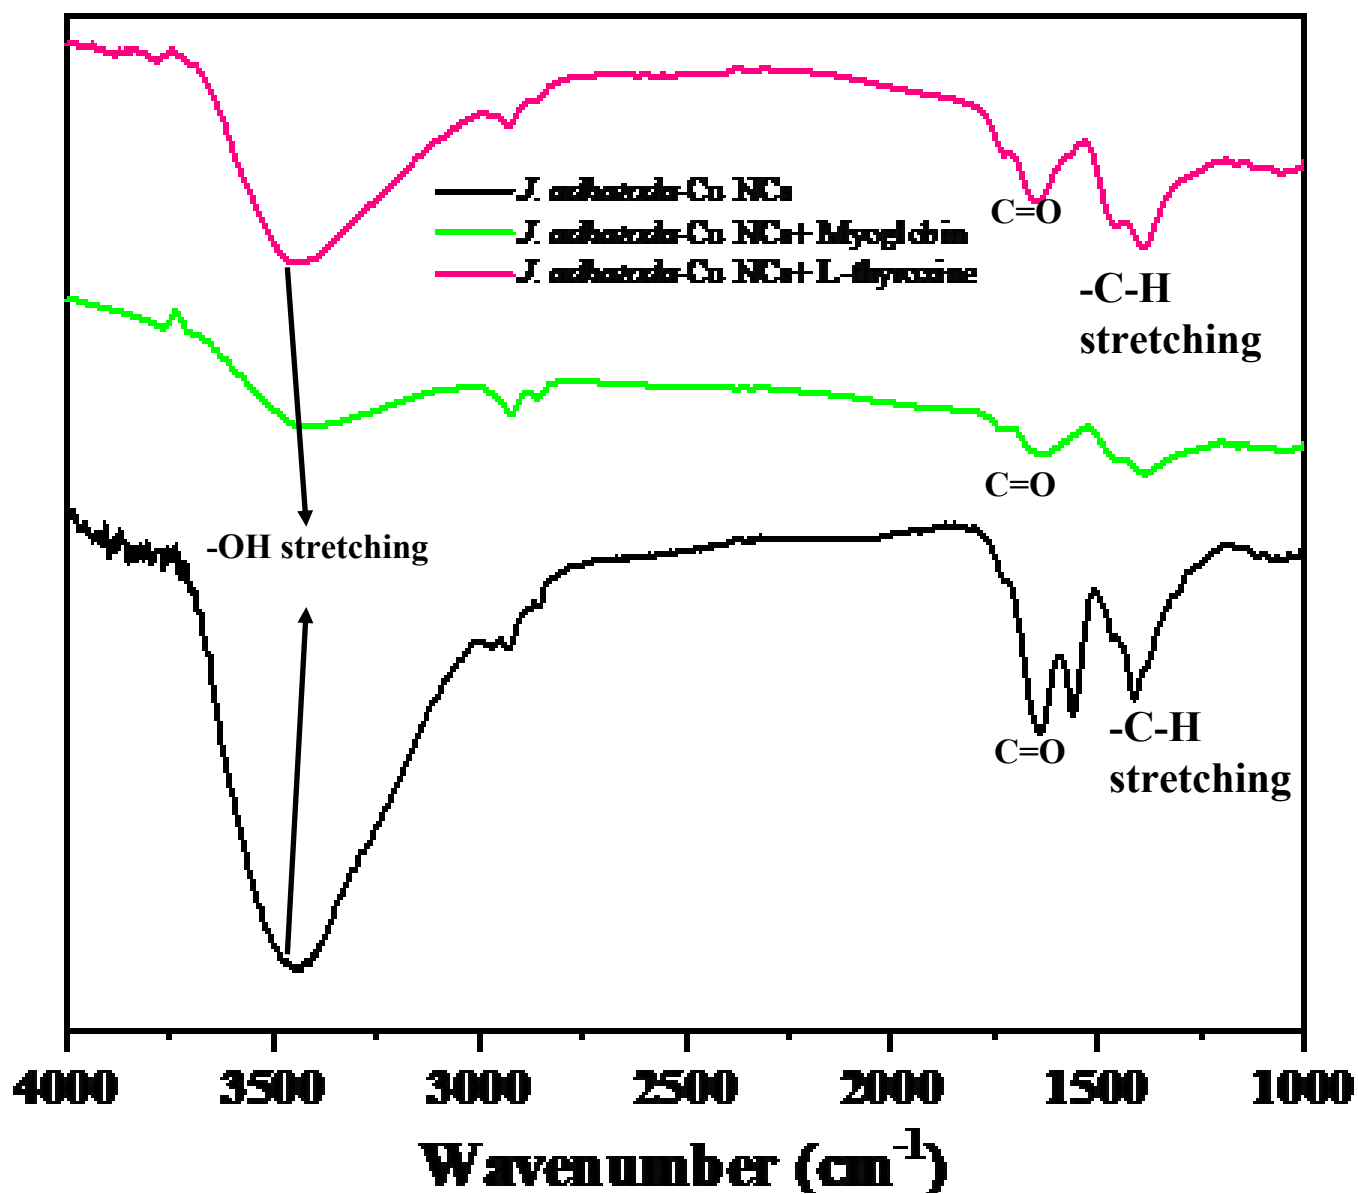

Figure S12. FTIR spectra of *J. adhatoda*-Cu NCs in presence of myoglobin and L-thyroxine

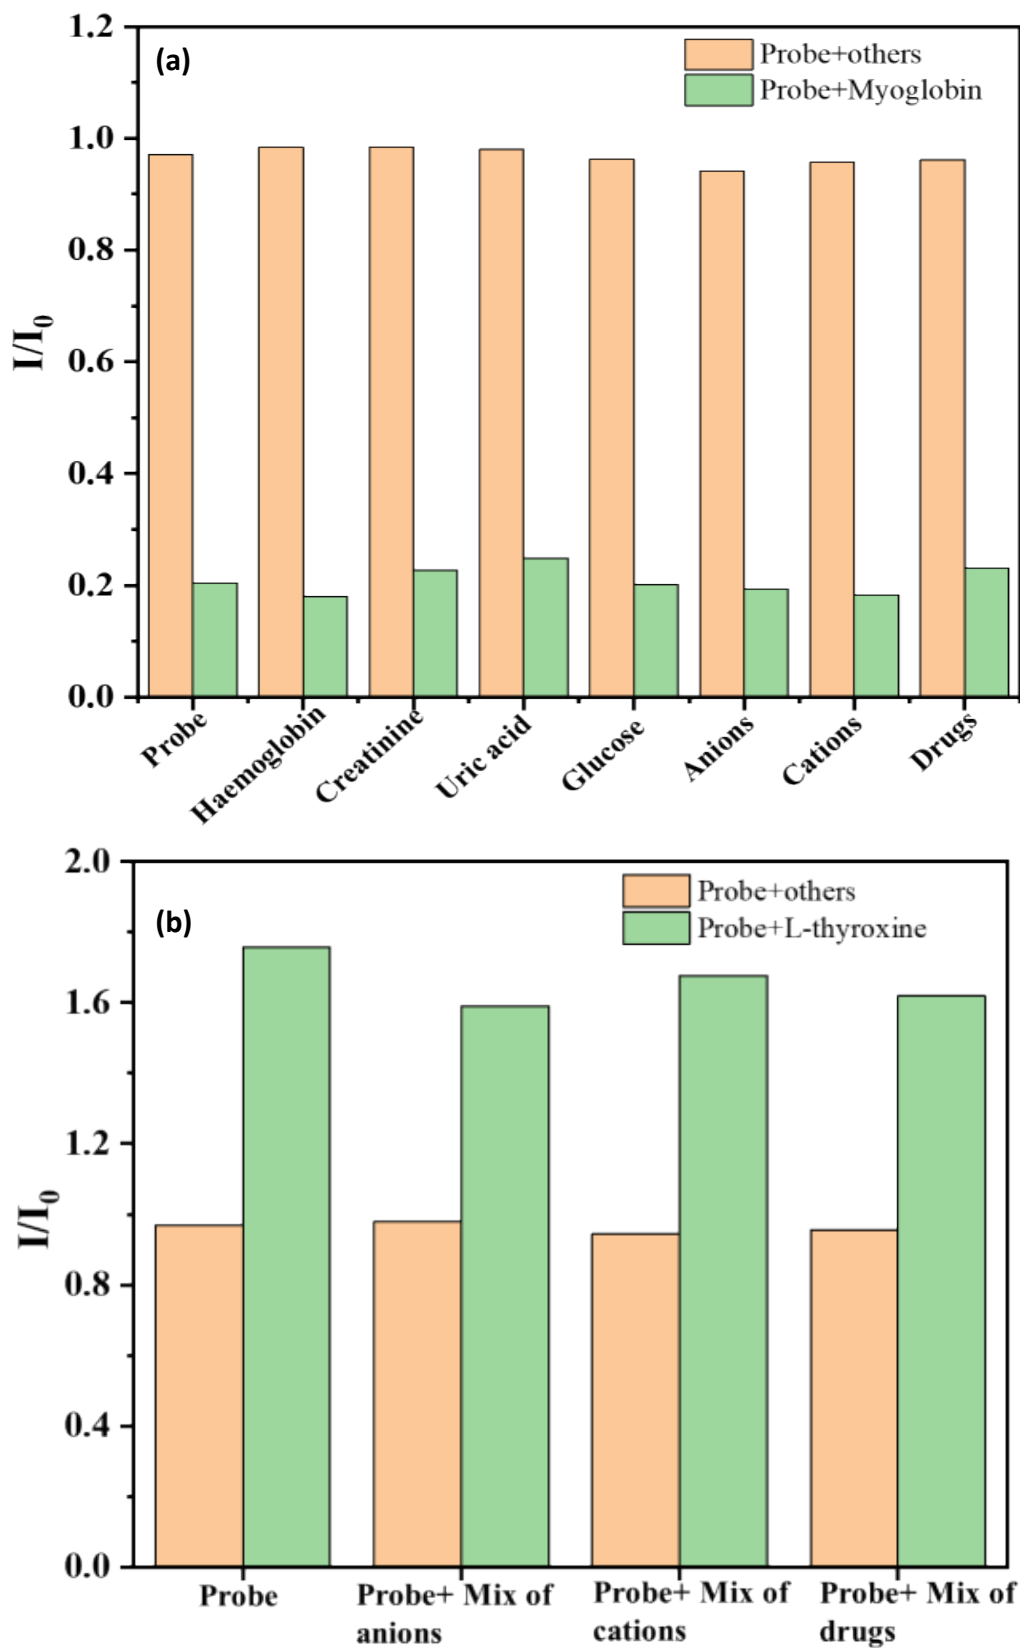

**Figure S13.** Selectivity study of *J. adhatoda*-Cu NCs with different biomarkers, cation, anion, drugs in presence of (a) myoglobin and (b) L-thyroxine (at 1:3 ratio)

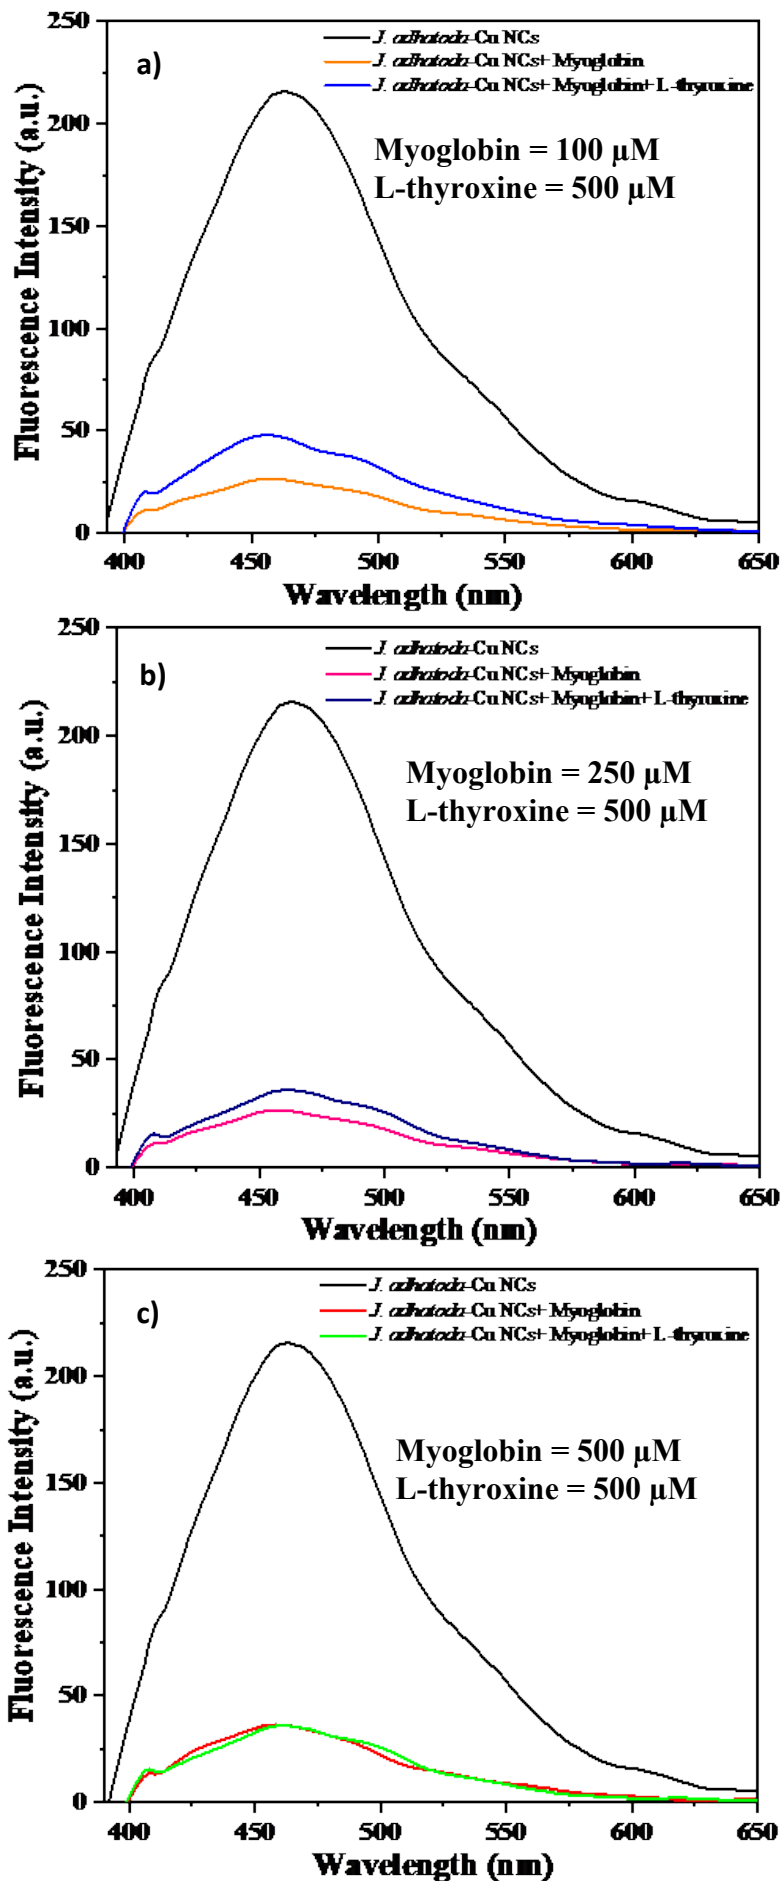

**Figure S14.** Investigation of selectivity of *J. adhatoda*-Cu NCs in the presence of myoglobin and L-thyroxine co-existed in one sample a) 100 :500  $\mu$ M b) 250: 500  $\mu$ M c) 500 : 500  $\mu$ M respectively.

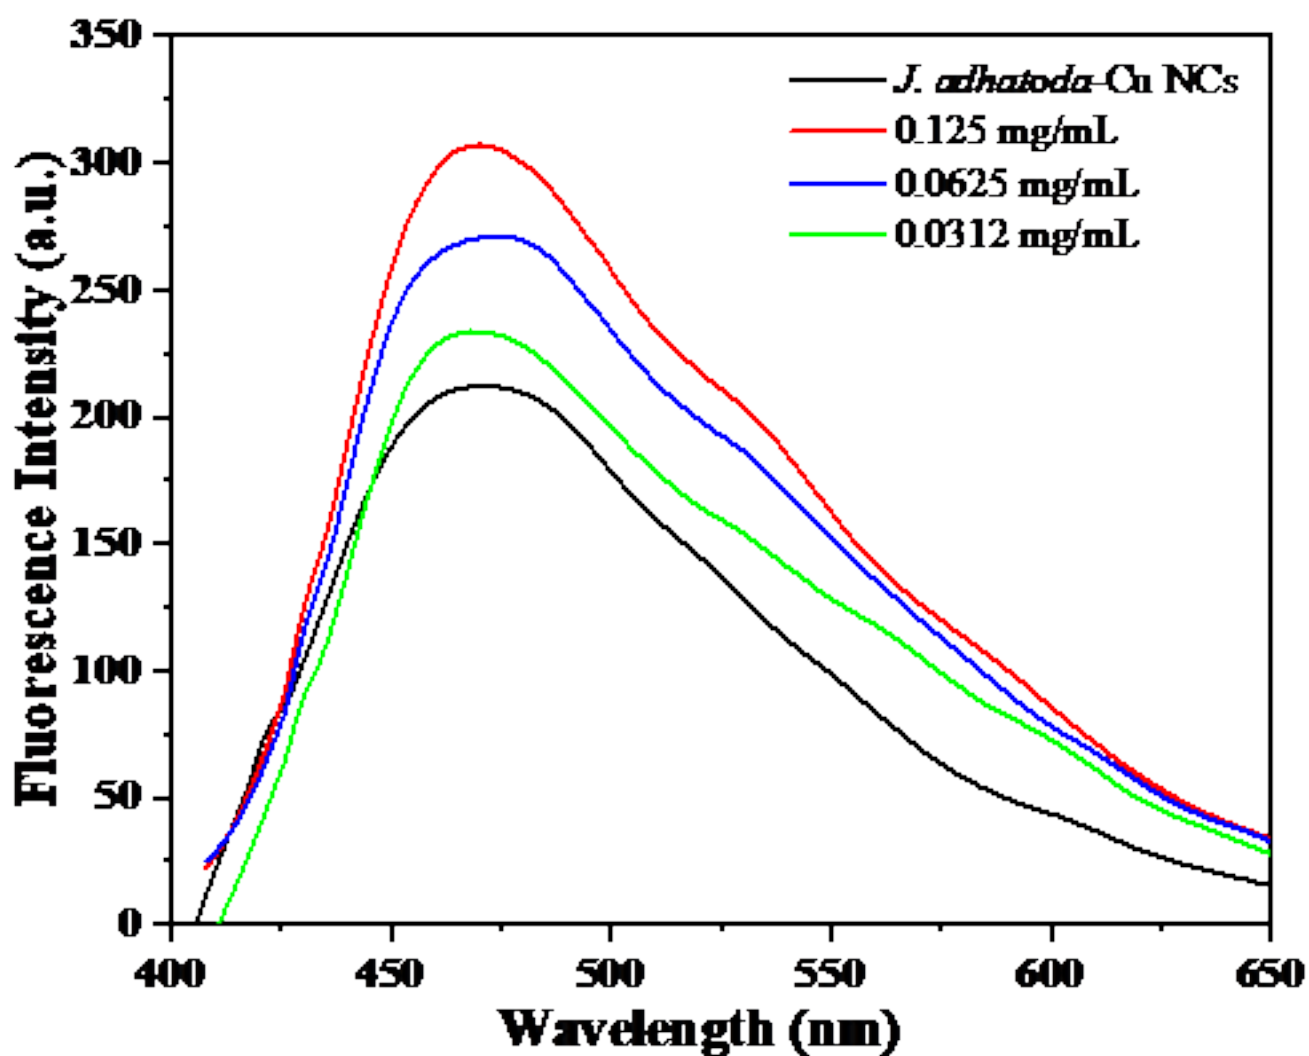

Figure S15. Emission spectra of *J. adhatoda*-Cu NCs with the addition of difference concentrations of Thyronorm 125 mcg tablet.



**Table S1.** Analysis of myoglobin and L-thyroxine in spiked serum samples by using *J. adhatoda* Cu NCs as a probe.

| <b>Biomarker</b> | <b>Sample</b> | <b>Added concentration (μM)</b> | <b>Found concentration (μM)</b> | <b>Recovery (%)</b> | <b>% RSD (n=3)</b> |
|------------------|---------------|---------------------------------|---------------------------------|---------------------|--------------------|
| Myoglobin        | Human serum   | 0.1                             | 0.098                           | 98.14               | 0.20               |
|                  |               | 0.25                            | 0.24                            | 97.63               | 0.15               |
|                  |               | 0.5                             | 0.50                            | 100.85              | 0.31               |
| L-Thyroxine      | Human serum   | 0.1                             | 0.99                            | 99.76               | 0.10               |
|                  |               | 0.2                             | 0.19                            | 99.74               | 0.15               |
|                  |               | 0.5                             | 0.49                            | 99.76               | 0.10               |

**Table S2.** Real sample (pharmaceutical composition) analysis of L-thyroxine by using *J. adhatoda* as a probe

| <b>Biomarker</b> | <b>Tablet</b>     | <b>L-thyroxine (Thyronorm 125 mcg) crushed tablet (mg/mL)</b> | <b>Found concentration (<math>\mu\text{M}</math>)</b> | <b>Recovery % (n=3)</b> | <b>RSD% (n=3)</b> |
|------------------|-------------------|---------------------------------------------------------------|-------------------------------------------------------|-------------------------|-------------------|
| L-Thyroxine      | Thyronorm-125 mcg | 0.125 (160 $\mu\text{M}$ )                                    | 156.48                                                | 97.80                   | 0.49              |
|                  |                   | 0.0625 (80 $\mu\text{M}$ )                                    | 76.14                                                 | 95.18                   | 0.28              |
|                  |                   | 0.0312 (40 $\mu\text{M}$ )                                    | 35.84                                                 | 89.62                   | 0.50              |
